# Supplementary material for: The Australasian Registry for Severe Cutaneous Adverse Reactions (AUS-SCAR) – Providing a roadmap for closing the diagnostic, patient, and healthcare gaps for a group of rare drug eruptions
Source: PubMed Central journal article supplement — World Allergy Organ J. 2024 Aug 5;17(8):100936. doi: 10.1016/j.waojou.2024.100936 (PMC11357849; doi:10.1016/j.waojou.2024.100936), 2024-08-05
Supplement: mmc2.pdf [file mmc2.pdf]

**Supplementary Table 1 – Participating site characteristics**

| Site                                | State | Burns Unit | Total Hospital Bed numbers |
|-------------------------------------|-------|------------|----------------------------|
| Austin Health                       | VIC   | N          | 800                        |
| Alfred Health                       | VIC   | Y          | 638                        |
| Royal Melbourne Hospital            | VIC   | N          | 571                        |
| St Vincent's Hospital Melbourne     | VIC   | N          | 793                        |
| Peter MacCallum Cancer Centre       | VIC   | N          | 312                        |
| Eastern Health (Box Hill Hospital)  | VIC   | N          | 621                        |
| Monash Health                       | VIC   | N          | 640                        |
| St Vincent's Hospital Sydney        | NSW   | N          | 402                        |
| Nepean Hospital                     | NSW   | N          | 520                        |
| Campbelltown Hospital               | NSW   | N          | 306                        |
| Royal North Shore Hospital          | NSW   | Y          | 600                        |
| Royal Adelaide Hospital             | SA    | Y          | 800                        |
| Royal Darwin Hospital               | NT    | N          | 360                        |
| Royal Brisbane and Women's Hospital | QLD   | Y          | 983                        |

**Abbreviations:** VIC, Victoria; NSW, New South Wales; SA, South Australia; NT, Northern Territory; QLD, Queensland.

**Supplementary Table 2 – Biospecimen repository collection**

|                                     | Overall<br>(N=100) | DRESS<br>(N=50) | SJS/TEN<br>(N=39) | AGEP<br>(N=10) | p-<br>value |
|-------------------------------------|--------------------|-----------------|-------------------|----------------|-------------|
| Acute samples collected             | 45<br>(45.0%)      | 21<br>(42%)     | 18 (46%)          | 6<br>(60%)     | 0.34        |
| DNA collected                       | 95<br>(95.0%)      | 49<br>(98%)     | 35 (90%)          | 10<br>(100%)   | 0.22        |
| DNA sample type                     |                    |                 |                   |                |             |
| Blood                               | 27<br>(27.0%)      | 14<br>(28%)     | 11 (28%)          | 1<br>(10%)     |             |
| Saliva                              | 35<br>(35.0%)      | 21<br>(42%)     | 9 (23%)           | 5<br>(50%)     |             |
| PBMC                                | 33<br>(33.0%)      | 14<br>(28%)     | 15 (38%)          | 4<br>(40%)     |             |
| HLA typing performed                | 92<br>(92.0%)      | 48<br>(96%)     | 34 (87%)          | 9<br>(90%)     | 0.48        |
| Blood collected for PBMC extraction | 57<br>(57.0%)      | 26<br>(52%)     | 24 (62%)          | 6<br>(60%)     | 0.58        |
| Skin collection                     | 24<br>(24.0%)      | 7 (14%)         | 16 (41%)          | 1<br>(10%)     | 0.00<br>7   |
| Blister fluid collection            | 8 (8.0%)           | 0 (0%)          | 7 (18%)           | 0 (0%)         | 0.00<br>3   |

**Abbreviations:** HLA, Human Leukocyte Antigen; PBMC, Peripheral Blood Mononuclear Cells

**Supplementary Table 3** – Causality assessment undertaken for each case by site

investigators

|                                                                                   |         | Overall<br>(N=100) | DRESS<br>(N=50) | SJS/TEN<br>(N=39) | AGEP<br>(N=10) |
|-----------------------------------------------------------------------------------|---------|--------------------|-----------------|-------------------|----------------|
| Was the SCAR suspected to be caused by a drug?                                    |         |                    |                 |                   |                |
|                                                                                   | No      | 2 (2%)             | 1 (2%)          | 1 (3%)            | 0 (0%)         |
|                                                                                   | Yes     | 96 (96%)           | 49 (98%)        | 37<br>(95%)       | 9<br>(90%)     |
|                                                                                   | Missing | 2 (2%)             | 0 (0%)          | 1 (3%)            | 1<br>(10%)     |
| Was the drug being administered at time of rash onset?                            |         |                    |                 |                   |                |
|                                                                                   | No      | 12 (12%)           | 6 (12%)         | 5 (13%)           | 1<br>(10%)     |
|                                                                                   | Yes     | 85 (85%)           | 44 (88%)        | 32<br>(82%)       | 8<br>(80%)     |
|                                                                                   | Missing | 3 (3%)             | 0 (0%)          | 2 (5%)            | 1<br>(10%)     |
| Was the drug being continuously administered for more than 8 weeks prior to rash? |         |                    |                 |                   |                |
|                                                                                   | No      | 96 (96%)           | 49 (98%)        | 37<br>(95%)       | 9<br>(90%)     |

|                                                                                         |                | Overall<br>(N=100) | DRESS<br>(N=50) | SJS/TEN<br>(N=39) | AGEP<br>(N=10) |
|-----------------------------------------------------------------------------------------|----------------|--------------------|-----------------|-------------------|----------------|
|                                                                                         | Yes            | 1 (1%)             | 1 (2%)          | 0 (0%)            | 0 (0%)         |
|                                                                                         | Missing        | 3 (3%)             | 0 (0%)          | 2 (5%)            | 1<br>(10%)     |
| Was the drug likely to be present in serum at time of rash onset [within 5 half lives]? |                |                    |                 |                   |                |
|                                                                                         | No             | 1 (1%)             | 1 (2%)          | 0 (0%)            | 0 (0%)         |
|                                                                                         | Yes            | 10 (10%)           | 4 (8%)          | 5 (13%)           | 1<br>(10%)     |
|                                                                                         | Missing        | 89 (89%)           | 45 (90%)        | 34<br>(87%)       | 9<br>(90%)     |
| What drug class?                                                                        |                |                    |                 |                   |                |
|                                                                                         | Antibiotic     | 60 (60%)           | 31 (62%)        | 20<br>(51%)       | 9<br>(90%)     |
|                                                                                         | Non-antibiotic | 37 (37%)           | 19 (38%)        | 17<br>(44%)       | 0 (0%)         |
|                                                                                         | Missing        | 3 (3%)             | 0 (0%)          | 2 (5%)            | 1<br>(10%)     |
| Was there only a single implicated causal drug?                                         |                |                    |                 |                   |                |
|                                                                                         | No             | 59 (59%)           | 28 (56%)        | 23<br>(59%)       | 8<br>(80%)     |

|                                                           |         | Overall<br>(N=100) | DRESS<br>(N=50)    | SJS/TEN<br>(N=39)  | AGEP<br>(N=10)    |
|-----------------------------------------------------------|---------|--------------------|--------------------|--------------------|-------------------|
|                                                           | Yes     | 38 (38%)           | 22 (44%)           | 14<br>(36%)        | 1<br>(10%)        |
|                                                           | Missing | 3 (3%)             | 0 (0%)             | 2 (5%)             | 1<br>(10%)        |
| Number of implicated drugs, median (IQR)                  |         | 3 (2, 4)<br>(n=60) | 2 (2, 3)<br>(n=29) | 3 (2, 4)<br>(n=23) | 2 (2, 3)<br>(n=8) |
| Was one or more antibiotics implicated in drug causality? |         |                    |                    |                    |                   |
|                                                           | No      | 30 (30%)           | 16 (32%)           | 13<br>(33%)        | 0 (0%)            |
|                                                           | Yes     | 67 (67%)           | 34 (68%)           | 24<br>(62%)        | 9<br>(90%)        |
|                                                           | Missing | 3 (3%)             | 0 (0%)             | 2 (5%)             | 1<br>(10%)        |
| Temporal association with vaccination?                    |         |                    |                    |                    |                   |
|                                                           | No      | 96 (96%)           | 47 (94%)           | 38<br>(97%)        | 10<br>(100%)      |
|                                                           | Yes     | 3 (3%)             | 3 (6%)             | 0 (0%)             | 0 (0%)            |
|                                                           | Missing | 1 (1%)             | 0 (0%)             | 1 (3%)             | 0 (0%)            |
| Temporal association with IV contrast?                    |         |                    |                    |                    |                   |

|                         |         | Overall<br>(N=100) | DRESS<br>(N=50) | SJS/TEN<br>(N=39) | AGEP<br>(N=10) |
|-------------------------|---------|--------------------|-----------------|-------------------|----------------|
|                         | No      | 93 (93%)           | 46 (92%)        | 36<br>(92%)       | 10<br>(100%)   |
|                         | Yes     | 5 (5%)             | 3 (6%)          | 2 (5%)            | 0 (0%)         |
|                         | Missing | 2 (2%)             | 1 (2%)          | 1 (3%)            | 0 (0%)         |
| Autoantibodies present? |         |                    |                 |                   |                |
|                         | No      | 54 (54%)           | 26 (52%)        | 24<br>(62%)       | 4<br>(40%)     |
|                         | Yes     | 19 (19%)           | 11 (22%)        | 7 (18%)           | 0 (0%)         |
|                         | Unknown | 27 (27%)           | 13 (26%)        | 8 (21%)           | 6<br>(60%)     |
| Autoantibody types      |         |                    |                 |                   |                |
|                         | ANA     | 43 (43%)           | 19 (38%)        | 20<br>(51%)       | 3<br>(30%)     |
|                         | ENA     | 27 (27%)           | 7 (14%)         | 17<br>(44%)       | 3<br>(30%)     |
|                         | dsDNA   | 25 (25%)           | 6 (12%)         | 16<br>(41%)       | 3<br>(30%)     |
|                         | Other   | 13 (13%)           | 4 (8%)          | 9 (23%)           | 0 (0%)         |

**Abbreviations:** ANA, Antinuclear antibody; ENA, Extractable Nuclear Antigen Antibodies; dsDNA, double stranded DNA; IQR, interquartile range; IV, intravenous

**Supplementary Table 4:** All implicated drugs, stratified for each phenotype.

|                       | Overall<br>(n=256) | DRESS<br>(n=135) | SJS/TEN<br>(n=99) | AGEP<br>(n=21) |
|-----------------------|--------------------|------------------|-------------------|----------------|
| Drug classification   |                    |                  |                   |                |
| Allopurinol           | 13 (5.0%)          | 7 (5.1%)         | 6 (6.0%)          | 0 (0.0%)       |
| Aminoglycoside        | 1 (0.4%)           | 1 (0.7%)         | 0 (0.0%)          | 0 (0.0%)       |
| Anaesthetic           | 1 (0.4%)           | 0 (0.0%)         | 0 (0.0%)          | 1 (4.8%)       |
| Anti-diabetic         | 2 (0.8%)           | 0 (0.0%)         | 2 (2.0%)          | 0 (0.0%)       |
| Anticoagulant         | 4 (1.6%)           | 3 (2.2%)         | 1 (1.0%)          | 0 (0.0%)       |
| Antiemetic            | 2 (0.8%)           | 2 (1.5%)         | 0 (0.0%)          | 0 (0.0%)       |
| Antiepileptic         | 16 (6.2%)          | 7 (5.1%)         | 9 (9.0%)          | 0 (0.0%)       |
| Antifungal            | 13 (5.0%)          | 9 (6.6%)         | 2 (2.0%)          | 2 (9.5%)       |
| Antituberculosis      | 2 (0.8%)           | 2 (1.5%)         | 0 (0.0%)          | 0 (0.0%)       |
| Antivirals            | 1 (0.4%)           | 0 (0.0%)         | 1 (1.0%)          | 0 (0.0%)       |
| Carbapenem            | 10 (3.9%)          | 5 (3.7%)         | 5 (5.0%)          | 0 (0.0%)       |
| Cephalosporin         | 27 (10.5%)         | 14 (10.3%)       | 9 (9.0%)          | 4 (19.0%)      |
| Check point inhibitor | 1 (0.4%)           | 0 (0.0%)         | 1 (1.0%)          | 0 (0.0%)       |
| Chemotherapeutic      | 9 (3.5%)           | 4 (2.9%)         | 5 (5.0%)          | 0 (0.0%)       |
| Contrast              | 3 (1.2%)           | 3 (2.2%)         | 0 (0.0%)          | 0 (0.0%)       |
| Diuretic              | 3 (1.2%)           | 1 (0.7%)         | 2 (2.0%)          | 0 (0.0%)       |
| Flozin                | 1 (0.4%)           | 0 (0.0%)         | 1 (1.0%)          | 0 (0.0%)       |
| Fluoroquinolone       | 6 (2.3%)           | 6 (4.4%)         | 0 (0.0%)          | 0 (0.0%)       |
| Glycopeptide          | 20 (7.8%)          | 13 (9.6%)        | 6 (6.0%)          | 1 (4.8%)       |

|                       | Overall<br>(n=256) | DRESS<br>(n=135) | SJS/TEN<br>(n=99) | AGEP<br>(n=21) |
|-----------------------|--------------------|------------------|-------------------|----------------|
| Iron                  | 1 (0.4%)           | 1 (0.7%)         | 0 (0.0%)          | 0 (0.0%)       |
| Lincosamide           | 4 (1.6%)           | 2 (1.5%)         | 1 (1.0%)          | 1 (4.8%)       |
| Monobactam            | 1 (0.4%)           | 1 (0.7%)         | 0 (0.0%)          | 0 (0.0%)       |
| NSAID/Analegesics     | 10 (3.9%)          | 2 (1.5%)         | 6 (6.0%)          | 1 (4.8%)       |
| Nitroimidazole        | 3 (1.2%)           | 1 (0.7%)         | 2 (2.0%)          | 0 (0.0%)       |
| Other - antibiotic    | 7 (2.7%)           | 4 (2.9%)         | 2 (2.0%)          | 1 (4.8%)       |
| Other - nonantibiotic | 15 (5.8%)          | 11 (8.1%)        | 4 (4.0%)          | 0 (0.0%)       |
| PPI                   | 10 (3.9%)          | 1 (0.7%)         | 9 (9.0%)          | 0 (0.0%)       |
| Penicillin            | 37 (14.3%)         | 19 (14.0%)       | 9 (9.0%)          | 9 (42.9%)      |
| Pholcodine            | 1 (0.4%)           | 1 (0.7%)         | 0 (0.0%)          | 0 (0.0%)       |
| SSRI                  | 2 (0.8%)           | 0 (0.0%)         | 2 (2.0%)          | 0 (0.0%)       |
| Sulfonamide           | 20 (7.8%)          | 9 (6.6%)         | 11 (11.0%)        | 0 (0.0%)       |
| Tetracycline          | 3 (1.2%)           | 1 (0.7%)         | 1 (1.0%)          | 1 (4.8%)       |
| Thyroxine             | 1 (0.4%)           | 0 (0.0%)         | 1 (1.0%)          | 0 (0.0%)       |
| Uricosuric Agents     | 2 (0.8%)           | 0 (0.0%)         | 2 (2.0%)          | 0 (0.0%)       |
| Vaccine               | 6 (2.3%)           | 6 (4.4%)         | 0 (0.0%)          | 0 (0.0%)       |
| <b>Drug Class</b>     |                    |                  |                   |                |
| Antibiotic            | 150<br>(58.1%)     | 85 (62.5%)       | 47 (47.0%)        | 18<br>(85.7%)  |
| Non-antibiotic        | 108<br>(41.9%)     | 51 (37.5%)       | 53 (53.0%)        | 3 (14.3%)      |



|                                                                                 |         | Overall<br>(n=256)    | DRESS<br>(n=135)      | SJS/TEN<br>(n=99)    | AGEP<br>(n=21)       |
|---------------------------------------------------------------------------------|---------|-----------------------|-----------------------|----------------------|----------------------|
| Was this the most likely implicated drug?                                       |         |                       |                       |                      |                      |
|                                                                                 | No      | 139<br>(53.9%)        | 69 (50.7%)            | 60 (60.0%)           | 10<br>(47.6%)        |
|                                                                                 | Yes     | 117<br>(45.3%)        | 67 (49.3%)            | 40 (40.0%)           | 9 (42.9%)            |
|                                                                                 | Missing | 2 (0.8%)              | 0 (0.0%)              | 0 (0.0%)             | 2 (9.5%)             |
| Total drug duration (day), median (IQR)                                         |         | 8 (3, 28)<br>(n=235)  | 8 (3, 28)<br>(n=123)  | 15 (4, 29)<br>(n=91) | 3 (.5, 8)<br>(n=20)  |
| Drug latency (day)*, median (IQR)                                               |         | 15 (5, 24)<br>(n=241) | 15 (5, 25)<br>(n=127) | 21 (7, 27)<br>(n=93) | 2.5 (1, 8)<br>(n=20) |
| Was the drug commenced pre onset of rash?                                       |         |                       |                       |                      |                      |
|                                                                                 | No      | 19 (7.4%)             | 16 (11.8%)            | 2 (2.0%)             | 1 (4.8%)             |
|                                                                                 | Yes     | 236<br>(91.5%)        | 118 (86.8%)           | 97 (97.0%)           | 20<br>(95.2%)        |
|                                                                                 | Missing | 3 (1.2%)              | 2 (1.5%)              | 1 (1.0%)             | 0 (0.0%)             |
| On day of rash onset > 5 half-lives of the drug elapsed since it was last taken |         |                       |                       |                      |                      |
|                                                                                 | No      | 193<br>(74.8%)        | 104 (76.5%)           | 72 (72.0%)           | 16<br>(76.2%)        |
|                                                                                 | Yes     | 56 (21.7%)            | 28 (20.6%)            | 26 (26.0%)           | 2 (9.5%)             |

|                                                        |         | Overall<br>(n=256)  | DRESS<br>(n=135)    | SJS/TEN<br>(n=99)    | AGEP<br>(n=21)     |
|--------------------------------------------------------|---------|---------------------|---------------------|----------------------|--------------------|
|                                                        | Missing | 9 (3.5%)            | 4 (2.9%)            | 2 (2.0%)             | 3 (14.3%)          |
| ALDEN Score, median (IQR)                              |         |                     |                     | 4 (1, 5) (n=97)      |                    |
| Naranjo Score, median (IQR)                            |         | 4 (3, 5)<br>(n=220) | 4 (4, 5)<br>(n=106) | 4 (3, 4.5)<br>(n=96) | 4 (4, 5)<br>(n=17) |
| History of same reaction to same drug?                 |         |                     |                     |                      |                    |
|                                                        | No      | 243<br>(94.2%)      | 128 (94.1%)         | 96 (96.0%)           | 19<br>(90.5%)      |
|                                                        | Yes     | 11 (4.3%)           | 7 (5.1%)            | 3 (3.0%)             | 0 (0.0%)           |
|                                                        | Missing | 4 (1.6%)            | 1 (0.7%)            | 1 (1.0%)             | 2 (9.5%)           |
| History of same reaction to similar drug (same class)? |         |                     |                     |                      |                    |
|                                                        | No      | 244<br>(94.6%)      | 129 (94.9%)         | 98 (98.0%)           | 16<br>(76.2%)      |
|                                                        | Yes     | 8 (3.1%)            | 5 (3.7%)            | 0 (0.0%)             | 3 (14.3%)          |
|                                                        | Missing | 6 (2.3%)            | 2 (1.5%)            | 2 (2.0%)             | 2 (9.5%)           |
| History of different reaction to same drug?            |         |                     |                     |                      |                    |
|                                                        | No      | 252<br>(97.7%)      | 135 (99.3%)         | 97 (97.0%)           | 19<br>(90.5%)      |
|                                                        | Yes     | 1 (0.4%)            | 0 (0.0%)            | 1 (1.0%)             | 0 (0.0%)           |
|                                                        | Missing | 5 (1.9%)            | 1 (0.7%)            | 2 (2.0%)             | 2 (9.5%)           |

|                                                             |         | Overall<br>(n=256) | DRESS<br>(n=135) | SJS/TEN<br>(n=99) | AGEP<br>(n=21) |
|-------------------------------------------------------------|---------|--------------------|------------------|-------------------|----------------|
| History of different reaction to similar drug (same class)? |         |                    |                  |                   |                |
|                                                             | No      | 246<br>(95.3%)     | 132 (97.1%)      | 95 (95.0%)        | 18<br>(85.7%)  |
|                                                             | Yes     | 4 (1.6%)           | 1 (0.7%)         | 2 (2.0%)          | 1 (4.8%)       |
|                                                             | Missing | 8 (3.1%)           | 3 (2.2%)         | 3 (3.0%)          | 2 (9.5%)       |

**Abbreviations:** PPI, proton pump inhibitor; NSAID, non-steroid anti-inflammatory; SSRI, selective serotonin receptor inhibitor; IQR, interquartile range

Note: (n = drug not n = participant):

\*Duration of drug given prior to rash onset

**Supplementary Table 5:** Summary of Patient Comorbidities Charlson Comorbidity Index and Patient Comorbidities Immunocompromised Status

|                                                              | Total<br>(n=100) | DRESS<br>(n=50) | SJS/TEN<br>(n=39) | AGEP<br>(n=10) | p-<br>value |
|--------------------------------------------------------------|------------------|-----------------|-------------------|----------------|-------------|
| <b>Patient Comorbidities Charlson Comorbidity Index</b>      |                  |                 |                   |                |             |
| Myocardial infarct                                           | 2 (2.0%)         | 1 (2%)          | 1 (3%)            | 0 (0%)         | 0.88        |
| Congestive heart failure                                     | 8 (8.0%)         | 3 (6%)          | 4 (10%)           | 1 (10%)        | 0.74        |
| Peripheral vascular disease                                  | 1 (1.0%)         | 1 (2%)          | 0 (0%)            | 0 (0%)         | 0.61        |
| Cerebrovascular disease (except hemiplegia)                  | 2 (2.0%)         | 2 (4%)          | 0 (0%)            | 0 (0%)         | 0.37        |
| Dementia                                                     | 2 (2.0%)         | 0 (0%)          | 2 (5%)            | 0 (0%)         | 0.21        |
| Chronic pulmonary disease                                    | 6 (6.0%)         | 1 (2%)          | 3 (8%)            | 2 (20%)        | 0.080       |
| Connective tissue disease                                    | 8 (8.0%)         | 4 (8%)          | 4 (10%)           | 0 (0%)         | 0.57        |
| Ulcer disease                                                | 4 (4.0%)         | 0 (0%)          | 4 (10%)           | 0 (0%)         | 0.040       |
| Mild liver disease                                           | 9 (9.0%)         | 3 (6%)          | 6 (15%)           | 0 (0%)         | 0.18        |
| Diabetes (without complications)                             | 9 (9.0%)         | 5 (10%)         | 2 (5%)            | 2 (20%)        | 0.33        |
| Diabetes with end organ damage                               | 6 (6.0%)         | 2 (4%)          | 3 (8%)            | 1 (10%)        | 0.66        |
| Hemiplegia or paraplegia                                     | 1 (1.0%)         | 1 (2%)          | 0 (0%)            | 0 (0%)         | 0.61        |
| Mod or severe renal disease                                  | 8 (8.0%)         | 4 (8%)          | 3 (8%)            | 1 (10%)        | 0.97        |
| Solid tumor (non-metastatic)                                 | 5 (5.0%)         | 3 (6%)          | 2 (5%)            | 0 (0%)         | 0.73        |
| Leukemia                                                     | 4 (4.0%)         | 3 (6%)          | 1 (3%)            | 0 (0%)         | 0.57        |
| Lymphoma, Multiple myeloma                                   | 5 (5.0%)         | 5 (10%)         | 0 (0%)            | 0 (0%)         | 0.076       |
| Mod or severe liver disease [cirrhosis + PHTN or transplant) | 4 (4.0%)         | 1 (2%)          | 3 (8%)            | 0 (0%)         | 0.32        |
| Metastatic solid tumor                                       | 7 (7.0%)         | 1 (2%)          | 6 (15%)           | 0 (0%)         | 0.033       |

|                                                |               |          |          |         |       |
|------------------------------------------------|---------------|----------|----------|---------|-------|
| AIDS                                           | 0 (0%)        | 0 (0%)   | 0 (0%)   | 0 (0%)  |       |
| Patient Comorbidities Immunocompromised Status |               |          |          |         |       |
| Immunocompromised - any                        | 38<br>(38.0%) | 18 (36%) | 17 (44%) | 3 (30%) | 0.65  |
| Autoimmune/connective tissue                   | 7 (7.0%)      | 2 (4%)   | 5 (13%)  | 0 (0%)  | 0.18  |
| Haematological malignancy (last 5 years)       | 10<br>(10.0%) | 9 (18%)  | 1 (3%)   | 0 (0%)  | 0.030 |
| Stem cell transplant                           | 3 (3.0%)      | 2 (4%)   | 1 (3%)   | 0 (0%)  | 0.78  |
| Solid organ transplant                         | 1 (1.0%)      | 1 (2%)   | 0 (0%)   | 0 (0%)  | 0.61  |
| Solid tumour malignancy (last 5 years)         | 7 (7.0%)      | 0 (0%)   | 7 (18%)  | 0 (0%)  | 0.003 |
| HIV (CD4< 500)                                 | 1 (1.0%)      | 0 (0%)   | 0 (0%)   | 1 (10%) | 0.011 |
| HIV (CD4>500)                                  | 0(0%)         | 0(0%)    | 0(0%)    | 0(0%)   |       |
| Prednisolone > 10mg daily for 1 month          | 4 (4.0%)      | 1 (2%)   | 3 (8%)   | 0 (0%)  | 0.32  |
| End stage kidney disease on dialysis           | 3 (3.0%)      | 1 (2%)   | 1 (3%)   | 1 (10%) | 0.39  |
| End stage chronic liver disease                | 2 (2.0%)      | 0 (0%)   | 2 (5%)   | 0 (0%)  | 0.21  |
| Splenectomy                                    | 2 (2.0%)      | 0 (0%)   | 1 (3%)   | 1 (10%) | 0.12  |
| Primary immunodeficiency                       | 0(0%)         | 0(0%)    | 0(0%)    | 0(0%)   |       |
| Other immunosuppressive medications            | 9 (9.0%)      | 3 (6%)   | 6 (15%)  | 0 (0%)  | 0.18  |

**Supplementary Table 6: History of previous skin disorder**

| Factor                                | Level                                                                                 | Total<br>(n=100) | AGEP<br>(n=10) | DRESS<br>(n=50) | SJS/TEN<br>(n=39) | p-<br>value |
|---------------------------------------|---------------------------------------------------------------------------------------|------------------|----------------|-----------------|-------------------|-------------|
| History of<br>prior skin<br>disorder? | No                                                                                    | 80 (81%)         | 9 (90%)        | 39 (78%)        | 32 (84%)          | 0.69        |
|                                       | Yes                                                                                   | 19 (19%)         | 1 (10%)        | 11 (22%)        | 6 (16%)           |             |
| Type                                  | Eczema                                                                                | 7 (7.0%)         | 1 (10%)        | 5 (10%)         | 1 (3%)            | 0.34        |
|                                       | Psoriasis                                                                             | 3 (3.0%)         | 0 (0%)         | 2 (4%)          | 1 (3%)            | 1.00        |
|                                       | Bullous<br>pemphigoid                                                                 | 0 (0%)           | 0 (0%)         | 0 (0%)          | 0 (0%)            |             |
|                                       | Cutaneous cell<br>lymphoma                                                            | 0 (0%)           | 0 (0%)         | 0 (0%)          | 0 (0%)            |             |
|                                       | Cutaneous lupus                                                                       | 0 (0%)           | 0 (0%)         | 0 (0%)          | 0 (0%)            |             |
|                                       | Other                                                                                 | 11 (11.0%)       | 0 (0%)         | 6 (12%)         | 4 (10%)           |             |
| Other skin disorder, specify          |                                                                                       |                  |                |                 |                   |             |
|                                       | Acne                                                                                  |                  |                | 1 (17%)         | 1 (25%)           |             |
|                                       | Chronic lower limb lymphoedema                                                        |                  |                | 1 (17%)         | 0 (0%)            |             |
|                                       | Diabetic foot ulcers                                                                  |                  |                | 1 (17%)         | 0 (0%)            |             |
|                                       | Lichen planus (oral, and patchy on skin)                                              |                  |                | 1 (17%)         | 0 (0%)            |             |
|                                       | SLE / undifferentiated connective tissue disease<br>but no prior cutaneous lupus rash |                  |                | 0 (0%)          | 1 (25%)           |             |
|                                       | crusted scabies                                                                       |                  |                | 1 (17%)         | 0 (0%)            |             |
|                                       | melanoma                                                                              |                  |                | 0 (0%)          | 1 (25%)           |             |
|                                       | pustular psoriasis                                                                    |                  |                | 1 (17%)         | 0 (0%)            |             |

|  |                                                                   |        |         |  |
|--|-------------------------------------------------------------------|--------|---------|--|
|  | unclear ? eczema; connective tissue disease<br>lupus/ rheumatoid? | 0 (0%) | 1 (25%) |  |
|--|-------------------------------------------------------------------|--------|---------|--|

**Supplementary Table 7: ICU admission details according to Patient Comorbidities Charlson**

**Comorbidity Index and Patient Comorbidities Immunocompromised Status**

|                                                              | No ICU<br>(n=72) | ICU<br>(n=28) | p-value |
|--------------------------------------------------------------|------------------|---------------|---------|
| <b>Patient Comorbidities Charlson Comorbidity Index</b>      |                  |               |         |
| CCI index                                                    | 2 (0, 4)         | 3 (1.5, 6)    | 0.029   |
| Myocardial infarct                                           | 1 (1%)           | 1 (4%)        | 0.48    |
| Congestive heart failure                                     | 5 (7%)           | 3 (11%)       | 0.53    |
| Peripheral vascular disease                                  | 1 (1%)           | 0 (0%)        | 0.53    |
| Cerebrovascular disease (except hemiplegia)                  | 1 (1%)           | 1 (4%)        | 0.48    |
| Dementia                                                     | 2 (3%)           | 0 (0%)        | 0.37    |
| Chronic pulmonary disease                                    | 4 (6%)           | 2 (7%)        | 0.76    |
| Connective tissue disease                                    | 8 (11%)          | 0 (0%)        | 0.066   |
| Ulcer disease                                                | 1 (1%)           | 3 (11%)       | 0.033   |
| Mild liver disease                                           | 5 (7%)           | 4 (14%)       | 0.25    |
| Diabetes (without complications)                             | 6 (8%)           | 3 (11%)       | 0.71    |
| Diabetes with end organ damage                               | 5 (7%)           | 1 (4%)        | 0.52    |
| Hemiplegia or paraplegia                                     | 1 (1%)           | 0 (0%)        | 0.53    |
| Mod or severe renal disease                                  | 3 (4%)           | 5 (18%)       | 0.023   |
| Solid tumor (non metastatic)                                 | 5 (7%)           | 0 (0%)        | 0.15    |
| Leukemia                                                     | 1 (1%)           | 3 (11%)       | 0.033   |
| Lymphoma, Multiple myeloma                                   | 3 (4%)           | 2 (7%)        | 0.54    |
| Mod or severe liver disease [cirrhosis + PHTN or transplant) | 0 (0%)           | 4 (14%)       | 0.001   |
| Metastatic solid tumor                                       | 4 (6%)           | 3 (11%)       | 0.36    |



|                                                |          |          |       |
|------------------------------------------------|----------|----------|-------|
| AIDS                                           | 0 (0%)   | 0 (0%)   |       |
| Patient Comorbidities Immunocompromised Status |          |          |       |
| Immunocompromised                              | 25 (35%) | 13 (46%) | 0.28  |
| Autoimmune/connective tissue                   | 7 (10%)  | 0 (0%)   | 0.087 |
| Haematological malignancy (last 5 years)       | 5 (7%)   | 5 (18%)  | 0.10  |
| Stem cell transplant                           | 1 (1%)   | 2 (7%)   | 0.13  |
| Solid organ transplant                         | 1 (1%)   | 0 (0%)   | 0.53  |
| Solid tumour malignancy (last 5 years)         | 4 (6%)   | 3 (11%)  | 0.36  |
| HIV (CD4< 500)                                 | 1 (1%)   | 0 (0%)   | 0.53  |
| HIV (CD4>500)                                  | 0 (0%)   | 0 (0%)   |       |
| Prednisolone > 10mg daily for 1 month          | 2 (3%)   | 2 (7%)   | 0.32  |
| End stage kidney disease on dialysis           | 2 (3%)   | 1 (4%)   | 0.83  |
| End stage chronic liver disease                | 0 (0%)   | 2 (7%)   | 0.022 |
| Splenectomy                                    | 1 (1%)   | 1 (4%)   | 0.48  |
| Primary immunodeficiency                       | 0 (0%)   | 0 (0%)   |       |
| Other immunosuppressive medications            | 5 (7%)   | 4 (14%)  | 0.25  |

**Supplementary Table 8:** Free text reports from investigators for reasons for readmission in the 16 patients reported in the analysis.

| Reasons for readmission                                                                                                                                       |
|---------------------------------------------------------------------------------------------------------------------------------------------------------------|
| finger nail loss and infection, ciprofloxacin immediate reaction (rash, 38C, abdo & chest pain, angioedema, tachycardia, hypotension, collapse ? anaphylaxis) |
| Recurrent rash 24-06-2020                                                                                                                                     |
| Worsening abdominal pain                                                                                                                                      |
| Bilateral hip and back pain in context of MSSA bacteraemia                                                                                                    |
| increasing prutitis and confusion from prednisolone                                                                                                           |
| Elevated LFTs, rash, jaundice                                                                                                                                 |
| Fever and rash                                                                                                                                                |
| Diabetes mellitus due to non-steroid drug                                                                                                                     |
| Flare 80% BSA rash, fever when Pred reduced to 37.5;DDx also started Dapsone 4.5weeks prior                                                                   |
| Progressive lymphoma                                                                                                                                          |
| ongoing severe worsening rash, subjective fevers                                                                                                              |
| ? drug overdose                                                                                                                                               |
| Sepsis                                                                                                                                                        |
| hyperkalaemia, painful tongue, fluid overload                                                                                                                 |
| took his own leave during first admission, ran out of medication, re-presented with recrudescence of skin reaction with oedema                                |
| for lung surgery Aug 2020                                                                                                                                     |
| Increasing pain and inability to cope at home due to MSSA bactaraemia                                                                                         |
| Elevated LFTs, body aches                                                                                                                                     |
| Progressive lymphoma                                                                                                                                          |
| MSSA bacteraemia                                                                                                                                              |
| Progressive lymphoma                                                                                                                                          |
| Progressive lymphoma                                                                                                                                          |

1. Ortonne N, Valeyrie-Allanore L, Bastuji-Garin S, Wechsler J, de Feraudy S, Duong TA, et al. Histopathology of drug rash with eosinophilia and systemic symptoms syndrome: a morphological and phenotypical study. *The British journal of dermatology*. 2015;173(1):50-8.
2. Sidoroff A, Halevy S, Bavinck JN, Vaillant L, Roujeau JC. Acute generalized exanthematous pustulosis (AGEP)--a clinical reaction pattern. *Journal of cutaneous pathology*. 2001;28(3):113-9.
