# Supplementary material for: The Australasian Registry for Severe Cutaneous Adverse Reactions (AUS-SCAR) – Providing a roadmap for closing the diagnostic, patient, and healthcare gaps for a group of rare drug eruptions
Source: PubMed Central journal article supplement — World Allergy Organ J. 2024 Aug 5;17(8):100936. doi: 10.1016/j.waojou.2024.100936 (PMC11357849; doi:10.1016/j.waojou.2024.100936), 2024-08-05
Supplement: mmc3.pdf [file mmc3.pdf]

Supplementary Figure 1 – Example of Case Summary for external validation

| <b>Study ID:</b> 8-2                                                                                                                                                                                                                                                                                                                                                                                                                                                                                                                                                                                                                                                                                                                                                                                                                                                                |                                                                                         | <b>Study Site:</b> Austin |                | <b>Index Date:</b> 3-Aug-2019 |                | <b>Phenotype:</b> DRESS |  |      |            |             |             |            |           |           |    |  |  |  |     |
|-------------------------------------------------------------------------------------------------------------------------------------------------------------------------------------------------------------------------------------------------------------------------------------------------------------------------------------------------------------------------------------------------------------------------------------------------------------------------------------------------------------------------------------------------------------------------------------------------------------------------------------------------------------------------------------------------------------------------------------------------------------------------------------------------------------------------------------------------------------------------------------|-----------------------------------------------------------------------------------------|---------------------------|----------------|-------------------------------|----------------|-------------------------|--|------|------------|-------------|-------------|------------|-----------|-----------|----|--|--|--|-----|
| <b>Rash features</b>                                                                                                                                                                                                                                                                                                                                                                                                                                                                                                                                                                                                                                                                                                                                                                                                                                                                |                                                                                         |                           |                |                               |                |                         |  |      |            |             |             |            |           |           |    |  |  |  |     |
| Components                                                                                                                                                                                                                                                                                                                                                                                                                                                                                                                                                                                                                                                                                                                                                                                                                                                                          | Maculopapular                                                                           |                           |                |                               |                |                         |  |      |            |             |             |            |           |           |    |  |  |  |     |
| Distribution                                                                                                                                                                                                                                                                                                                                                                                                                                                                                                                                                                                                                                                                                                                                                                                                                                                                        | >50%                                                                                    |                           |                |                               |                |                         |  |      |            |             |             |            |           |           |    |  |  |  |     |
| Facial oedema                                                                                                                                                                                                                                                                                                                                                                                                                                                                                                                                                                                                                                                                                                                                                                                                                                                                       | Yes                                                                                     |                           |                |                               |                |                         |  |      |            |             |             |            |           |           |    |  |  |  |     |
| Palms/soles involved                                                                                                                                                                                                                                                                                                                                                                                                                                                                                                                                                                                                                                                                                                                                                                                                                                                                | Yes                                                                                     |                           |                |                               |                |                         |  |      |            |             |             |            |           |           |    |  |  |  |     |
| Pruritus                                                                                                                                                                                                                                                                                                                                                                                                                                                                                                                                                                                                                                                                                                                                                                                                                                                                            | Yes                                                                                     |                           |                |                               |                |                         |  |      |            |             |             |            |           |           |    |  |  |  |     |
| Fever > 38°C                                                                                                                                                                                                                                                                                                                                                                                                                                                                                                                                                                                                                                                                                                                                                                                                                                                                        | NO                                                                                      |                           |                |                               |                |                         |  |      |            |             |             |            |           |           |    |  |  |  |     |
| Enlarged lymph nodes                                                                                                                                                                                                                                                                                                                                                                                                                                                                                                                                                                                                                                                                                                                                                                                                                                                                | No                                                                                      |                           |                |                               |                |                         |  |      |            |             |             |            |           |           |    |  |  |  |     |
| Atypical lymphocytes                                                                                                                                                                                                                                                                                                                                                                                                                                                                                                                                                                                                                                                                                                                                                                                                                                                                | Yes                                                                                     |                           |                |                               |                |                         |  |      |            |             |             |            |           |           |    |  |  |  |     |
| Eosinophilia                                                                                                                                                                                                                                                                                                                                                                                                                                                                                                                                                                                                                                                                                                                                                                                                                                                                        | Yes ->= 1.5X10 <sup>9</sup> /L                                                          |                           |                |                               |                |                         |  |      |            |             |             |            |           |           |    |  |  |  |     |
| Organ involvement                                                                                                                                                                                                                                                                                                                                                                                                                                                                                                                                                                                                                                                                                                                                                                                                                                                                   | Yes - kidneys                                                                           |                           |                |                               |                |                         |  |      |            |             |             |            |           |           |    |  |  |  |     |
| Duration >= 15 days                                                                                                                                                                                                                                                                                                                                                                                                                                                                                                                                                                                                                                                                                                                                                                                                                                                                 | Yes                                                                                     |                           |                |                               |                |                         |  |      |            |             |             |            |           |           |    |  |  |  |     |
| Other causes excluded                                                                                                                                                                                                                                                                                                                                                                                                                                                                                                                                                                                                                                                                                                                                                                                                                                                               | Yes                                                                                     |                           |                |                               |                |                         |  |      |            |             |             |            |           |           |    |  |  |  |     |
| RegiSCAR score                                                                                                                                                                                                                                                                                                                                                                                                                                                                                                                                                                                                                                                                                                                                                                                                                                                                      | 5                                                                                       |                           |                |                               |                |                         |  |      |            |             |             |            |           |           |    |  |  |  |     |
| Prior skin disorder                                                                                                                                                                                                                                                                                                                                                                                                                                                                                                                                                                                                                                                                                                                                                                                                                                                                 | Eczema                                                                                  |                           |                |                               |                |                         |  |      |            |             |             |            |           |           |    |  |  |  |     |
| Concurrent infection                                                                                                                                                                                                                                                                                                                                                                                                                                                                                                                                                                                                                                                                                                                                                                                                                                                                | Yes- Staphylococcus epidermidis endocarditis                                            |                           |                |                               |                |                         |  |      |            |             |             |            |           |           |    |  |  |  |     |
| HSV / mycoplasma detected                                                                                                                                                                                                                                                                                                                                                                                                                                                                                                                                                                                                                                                                                                                                                                                                                                                           | Not detected                                                                            |                           |                |                               |                |                         |  |      |            |             |             |            |           |           |    |  |  |  |     |
| Treatment                                                                                                                                                                                                                                                                                                                                                                                                                                                                                                                                                                                                                                                                                                                                                                                                                                                                           | Systemic and topical steroids 14 days.                                                  |                           |                |                               |                |                         |  |      |            |             |             |            |           |           |    |  |  |  |     |
| Skin testing results                                                                                                                                                                                                                                                                                                                                                                                                                                                                                                                                                                                                                                                                                                                                                                                                                                                                | IDT- Vancomycin 5, 50mg/ml positive at 24 hours. IDT- Negative telocaplanin 5, 50 mg/ml |                           |                |                               |                |                         |  |      |            |             |             |            |           |           |    |  |  |  |     |
| <table border="1"> <thead> <tr> <th>Drug</th> <th>Date Start</th> <th>Date Ceased</th> <th>Latency (d)</th> </tr> </thead> <tbody> <tr> <td>Vancomycin</td> <td>03-Jul-19</td> <td>06-Aug-19</td> <td>31</td> </tr> <tr> <td></td> <td></td> <td></td> <td>N/A</td> </tr> </tbody> </table>                                                                                                                                                                                                                                                                                                                                                                                                                                                                                                                                                                                         |                                                                                         |                           |                |                               |                |                         |  | Drug | Date Start | Date Ceased | Latency (d) | Vancomycin | 03-Jul-19 | 06-Aug-19 | 31 |  |  |  | N/A |
| Drug                                                                                                                                                                                                                                                                                                                                                                                                                                                                                                                                                                                                                                                                                                                                                                                                                                                                                | Date Start                                                                              | Date Ceased               | Latency (d)    |                               |                |                         |  |      |            |             |             |            |           |           |    |  |  |  |     |
| Vancomycin                                                                                                                                                                                                                                                                                                                                                                                                                                                                                                                                                                                                                                                                                                                                                                                                                                                                          | 03-Jul-19                                                                               | 06-Aug-19                 | 31             |                               |                |                         |  |      |            |             |             |            |           |           |    |  |  |  |     |
|                                                                                                                                                                                                                                                                                                                                                                                                                                                                                                                                                                                                                                                                                                                                                                                                                                                                                     |                                                                                         |                           | N/A            |                               |                |                         |  |      |            |             |             |            |           |           |    |  |  |  |     |
| <p><b>Patient Demographics</b><br/>56 yr old Australian male with prosthetic aortic valve endocarditis (Staphylococcus epidermidis). Initial AVR 3rd June, presented with sternal wound infection 28th June. Commenced on vancomycin, rifampicin and cipro.</p> <p><b>Medical history</b><br/>1. Congestive heart failure<br/>2. Asthma<br/>3. Eczema<br/>4. HT<br/>5. Prostate Cancer<br/>6. Allergies: Bee sting, aspirin, morphine</p> <p><b>Histopathology report</b><br/>CLINICAL NOTES: ? DRESS.<br/>Specimen 2. Direct immunofluorescence studies have been performed. There is no specific intraepidermal basement membranes nor dermal/vascular staining with IgG, IgA, IgM, C3c or C1q.<br/>CONCLUSION 1&amp;2. Skin punch biopsies, back-- spongiotic dermatitis with eosinophilia. An eczematous process and spongiotic drug eruption are both considered possible.</p> |                                                                                         |                           |                |                               |                |                         |  |      |            |             |             |            |           |           |    |  |  |  |     |
| <b>HLA typing</b>                                                                                                                                                                                                                                                                                                                                                                                                                                                                                                                                                                                                                                                                                                                                                                                                                                                                   |                                                                                         |                           |                |                               |                |                         |  |      |            |             |             |            |           |           |    |  |  |  |     |
| HLA-A Allele 1                                                                                                                                                                                                                                                                                                                                                                                                                                                                                                                                                                                                                                                                                                                                                                                                                                                                      | HLA-A Allele 2                                                                          | HLA-B Allele 1            | HLA-B Allele 2 | HLA-C Allele 1                | HLA-C Allele 2 |                         |  |      |            |             |             |            |           |           |    |  |  |  |     |
| 02:01:01G                                                                                                                                                                                                                                                                                                                                                                                                                                                                                                                                                                                                                                                                                                                                                                                                                                                                           | 03:01:01G                                                                               | 07:02:01G                 | 52:01:01G      | 07:02:01G                     | 12:02:01G      |                         |  |      |            |             |             |            |           |           |    |  |  |  |     |
|                                                                                                                                                                                                                                                                                                                                                                                                                                                                                                                                                                                                                                                                                                                                                                                                 |                                                                                         |                           |                |                               |                |                         |  |      |            |             |             |            |           |           |    |  |  |  |     |
|                                                                                                                                                                                                                                                                                                                                                                                                                                                                                                                                                                                                                                                                                                                                                                                                  |                                                                                         |                           |                |                               |                |                         |  |      |            |             |             |            |           |           |    |  |  |  |     |
|                                                                                                                                                                                                                                                                                                                                                                                                                                                                                                                                                                                                                                                                                                                                                                                                |                                                                                         |                           |                |                               |                |                         |  |      |            |             |             |            |           |           |    |  |  |  |     |

**Supplementary Figure 2: All listed drugs classes by phenotype**

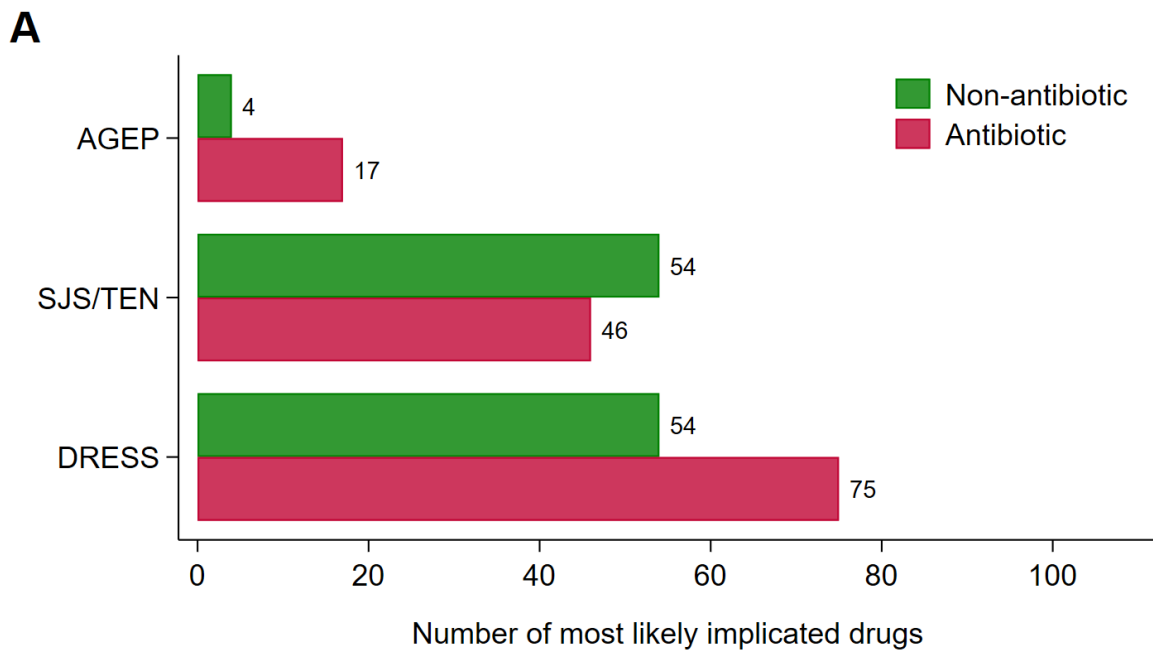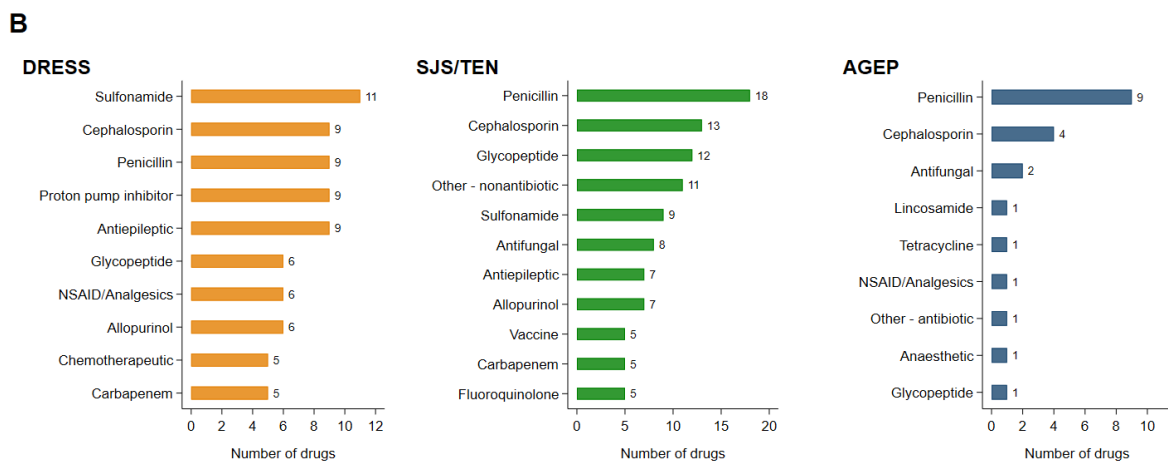

**Supplementary 2 Figure Legend**

A. Phenotypes stratified for all antibiotic vs. non-antibiotic implicated drug causality

B. Phenotypes stratified for drug class for all implicated drugs

Other antibiotic: daptomycin

Other nonantibiotic: amiodarone, atorvastatin, noradrenaline
